# Supplementary material
Source: PubMed Central journal article supplement (PMC3710758)
Supplement: mmc1.pdf [file mmc1.pdf]

## Supplemental Data

### SHORT Syndrome with Partial Lipodystrophy

#### Due to Impaired Phosphatidylinositol 3 Kinase Signaling

Kishan Kumar Chudasama, Jonathon Winnay, Stefan Johansson, Tor Claudi, Rainer König, Ingrid Haldorsen, Bente Johansson, Ju Rang Woo, Dagfinn Aarskog, Jørn V. Sagen, C. Ronald Kahn, Anders Molven, and Pål Rasmus Njølstad

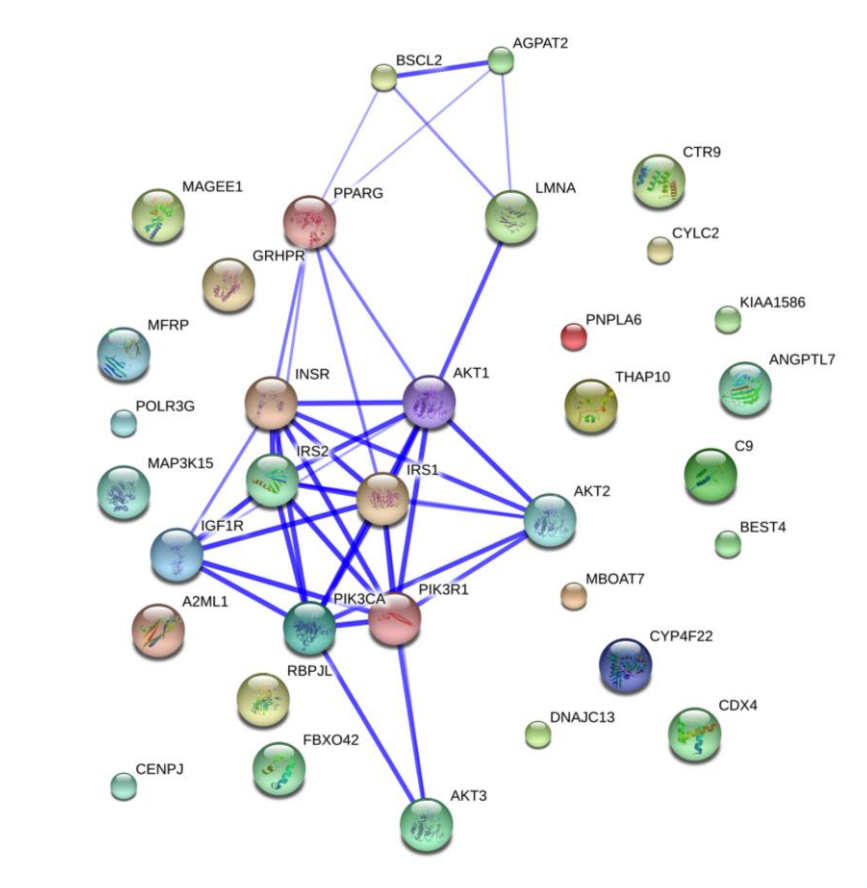

**Figure S1. Protein-Network Analysis (STRING) by Searching for Physical or Functional Associations**

We performed protein-network analysis with information from genomic context, reported experiments, co-expression and PubMed (<http://www.string-db.org>). We included the 22 candidate genes resulting from the exome sequencing and 12 genes related to lipodystrophy and insulin signaling (*AGPAT2*, *BSCL2*, *IGF1R*, *LMNA*, *PPARG*, *INSR*, *IRS1*, *IRS2*, *PIK3CA*, *AKT1*, *AKT2* and *AKT3*). Only one of our candidate genes, *PIK3R1*, clustered with genes involved in insulin signaling and fat metabolism.

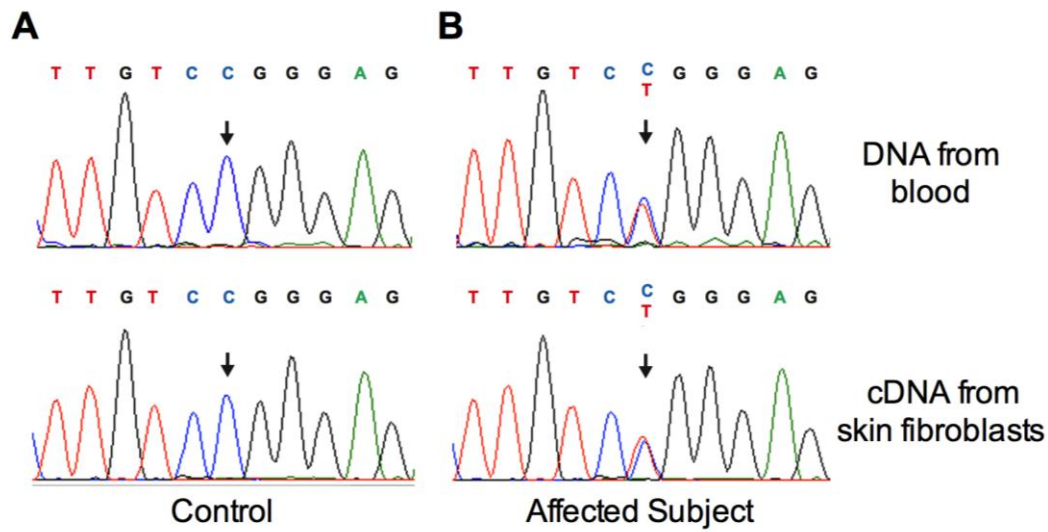

**Figure S2. Sequence Analysis of DNA and cDNA of Affected and Healthy Individuals**

Cultured skin fibroblasts were prepared from punch biopsies of the skin of one affected (Subject II-2) and one unaffected (Subject II-3) member of Family 1, and messenger RNA extracted, followed by cDNA synthesis. DNA sequences of the *PIK3R1* region of interest in a patient (B) (Family 1, Subject III-2) compared with a control (A). The results obtained from DNA in peripheral blood are shown in the top panel while the results of the lower panel are from cDNA made of RNA from skin fibroblasts. The right panels show the heterozygous missense mutation (c.1945C→T; marked with an arrow) in exon 15, corresponding to an amino acid change from arginine to tryptophan (p.Arg649Trp).

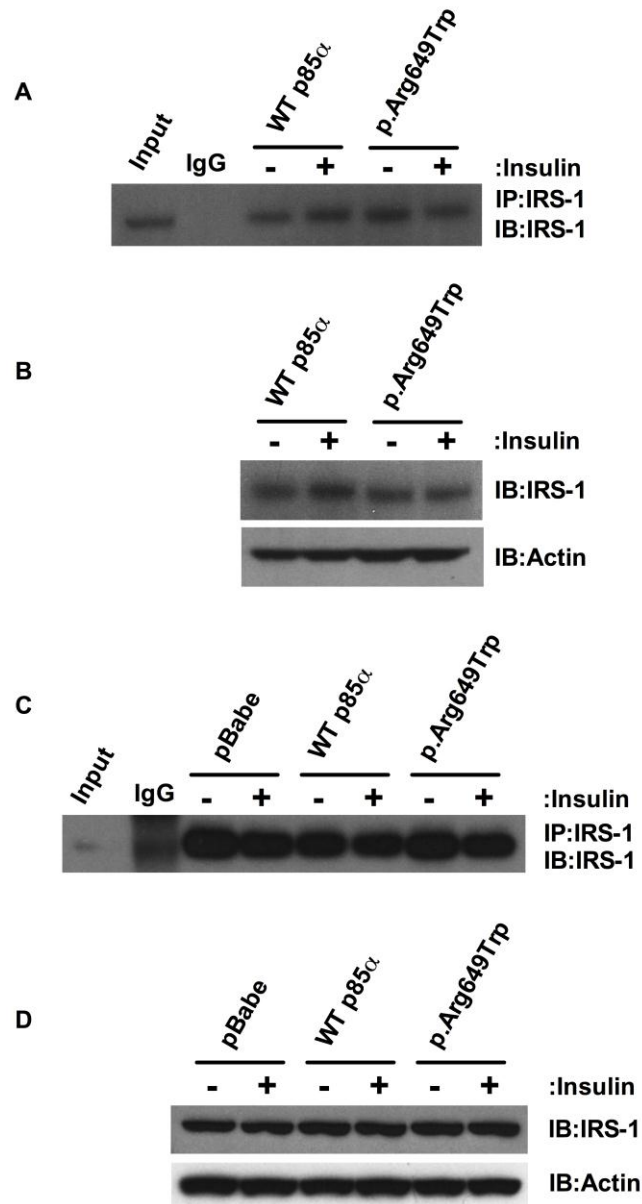

**Figure S3. Expression and Immunoprecipitation Efficiency of IRS-1 Is Unaltered in Control and p.Arg649Trp Fibroblasts and p85 $\alpha$  Reconstituted Cell Lines**

(A) IRS-1 was immunoprecipitated from whole cell lysates obtained from control and p.Arg649WTrp human fibroblasts before or following insulin stimulation (10nM) for 10 minutes, resolved by SDS-PAGE and subsequently immunoblotted using IRS-1-specific antibodies.

(B) IRS-1 expression was assessed in control and p.Arg649Trp human fibroblasts in the absence or presence of insulin (10nM) for 10 minutes by performing immunoblot analysis on whole cell lysates using IRS-1-specific antibodies.

(C) IRS-1 was immunoprecipitated from whole cell lysates obtained from pBabe, WT or p.Arg649Trp reconstituted p85 $\alpha$ /p85 $\beta$ -deficient cell lines in the absence or presence of insulin (10nM) for 10 minutes, resolved by SDS-PAGE and subsequently immunoblotted using anti-IRS-1 antibodies.

(D) IRS-1 expression was assessed in whole cell lysates obtained from pBabe, WT or p.Arg649Trp cells in the absence or presence of insulin (10nM) for 10 minutes by performing immunoblot analysis using anti-IRS-1 antibodies.

| Chr | dbSNP             | pos             | Fam1       |            | Fam2       |            | Haplo Fam1 | Haplo Fam2 | Not shared |
|-----|-------------------|-----------------|------------|------------|------------|------------|------------|------------|------------|
|     |                   |                 | III-2      | II-2       | III-2      | II-1       |            |            |            |
| 5   | rs10515070        | 67525575        | 2 2        | 2 2        | 1 1        | 1 2        | 1          | 2          | x          |
| 5   | rs16897511        | 67526313        | 1 2        | 2 2        | 2 2        | 2 2        | 2          | 2          |            |
| 5   | rs6881033         | 67529191        | 1 2        | 2 2        | 1 1        | 1 2        | 1          | 2          | x          |
| 5   | rs4122269         | 67545624        | 1 2        | 2 2        | 2 2        | 2 2        | 2          | 2          |            |
| 5   | rs40318           | 67545753        | 2 2        | 2 2        | 1 1        | 1 2        | 1          | 2          | x          |
| 5   | rs10940159        | 67547276        | 2 2        | 2 2        | 2 2        | 2 2        | 2          | 2          |            |
| 5   | rs173703          | 67547326        | 1 2        | 2 2        | 1 1        | 1 2        | 1          | 2          | x          |
| 5   | rs831229          | 67553016        | 2 2        | 2 2        | 1 1        | 1 2        | 1          | 2          | x          |
| 5   | rs6893676         | 67553771        | 2 2        | 2 2        | 2 2        | 2 2        | 2          | 2          |            |
| 5   | rs863818          | 67554023        | 2 2        | 2 2        | 1 1        | 1 2        | 1          | 2          | x          |
| 5   | rs831121          | 67554926        | 2 2        | 2 2        | 1 1        | 1 2        | 1          | 2          | x          |
| 5   | rs13167294        | 67555580        | 2 2        | 2 2        | 2 2        | 2 2        | 2          | 2          |            |
| 5   | rs16897561        | 67560716        | 2 2        | 2 2        | 2 2        | 2 2        | 2          | 2          |            |
| 5   | rs6863431         | 67561015        | 2 2        | 2 2        | 2 2        | 2 2        | 2          | 2          |            |
| 5   | rs10072475        | 67568728        | 2 2        | 2 2        | 2 2        | 2 2        | 2          | 2          |            |
| 5   | rs2302975         | 67569479        | 2 2        | 2 2        | 2 2        | 2 2        | 2          | 2          |            |
| 5   | rs2302976         | 67569602        | 2 2        | 2 2        | 2 2        | 2 2        | 2          | 2          |            |
| 5   | rs171649          | 67569746        | 2 2        | 2 2        | 1 1        | 1 2        | 1          | 2          | x          |
| 5   | <b>rs251409</b>   | <b>67573463</b> | <b>2 2</b> | <b>2 2</b> | <b>1 1</b> | <b>1 2</b> | <b>1</b>   | <b>2</b>   | <b>x</b>   |
| 5   | rs17318918        | 67573919        | 2 2        | 2 2        | 2 2        | 2 2        | 2          | 2          |            |
| 5   | rs34308           | 67579223        | 2 2        | 2 2        | 1 2        | 1 2        | 1/2        | 2          |            |
| 5   | rs12657050        | 67579576        | 1 2        | 1 2        | 1 2        | 1 2        | 1/2        | 1/2        |            |
| 5   | <b>Mutation</b>   | <b>67592129</b> | <b>x</b>   | <b>x</b>   | <b>x</b>   | <b>x</b>   |            |            |            |
| 5   | rs895304          | 67592281        | 2 2        | 2 2        | 2 2        | 2 2        | 2          | 2          |            |
| 5   | rs7714169         | 67592640        | 2 2        | 2 2        | 2 2        | 2 2        | 2          | 2          |            |
| 5   | rs3729981         | 67593363        | 2 2        | 2 2        | 2 2        | 2 2        | 2          | 2          |            |
| 5   | rs1043526         | 67594324        | 1 2        | 1 2        | 2 2        | 2 2        | 2          | 1/2        |            |
| 5   | rs7722222         | 67595785        | 2 2        | 2 2        | 2 2        | 2 2        | 2          | 2          |            |
| 5   | rs3756668         | 67596088        | 1 2        | 1 2        | 1 2        | 1 2        | 1/2        | 1/2        |            |
| 5   | rs7701952         | 67602847        | 2 2        | 2 2        | 2 2        | 2 2        | 2          | 2          |            |
| 5   | rs695166          | 67604628        | 1 2        | 1 2        | 1 2        | 1 2        | 1/2        | 1/2        |            |
| 5   | rs411751          | 67605884        | 2 2        | 2 2        | 1 2        | 1 2        | 1/2        | 2          |            |
| 5   | rs440292          | 67609408        | 1 2        | 1 2        | 1 2        | 1 2        | 1/2        | 1/2        |            |
| 5   | rs453940          | 67610482        | 1 2        | 1 2        | 1 2        | 1 2        | 1/2        | 1/2        |            |
| 5   | rs10515077        | 67613801        | 2 2        | 2 2        | 2 2        | 2 2        | 2          | 2          |            |
| 5   | rs391974          | 67614893        | 2 2        | 2 2        | 1 2        | 1 2        | 1/2        | 2          |            |
| 5   | <b>rs17253786</b> | <b>67615528</b> | <b>1 1</b> | <b>1 2</b> | <b>2 2</b> | <b>2 2</b> | <b>2</b>   | <b>1</b>   | <b>x</b>   |
| 5   | rs6859287         | 67628886        | 2 2        | 2 2        | 2 2        | 2 2        | 2          | 2          |            |
| 5   | rs256505          | 67629059        | 2 2        | 2 2        | 2 2        | 2 2        | 2          | 2          |            |
| 5   | rs16897697        | 67633340        | 2 2        | 2 2        | 2 2        | 2 2        | 2          | 2          |            |
| 5   | rs16897699        | 67636057        | 2 2        | 2 2        | 2 2        | 2 2        | 2          | 2          |            |
| 5   | rs10515080        | 67643213        | 2 2        | 2 2        | 2 2        | 2 2        | 2          | 2          |            |
| 5   | rs40055           | 67647834        | 1 1        | 0 0        | 2 2        | 2 2        | 2          | 1          | x          |

**Figure S4. Fine Mapping and Haplotype Analysis of Region Surrounding the *PIK3R1* Mutation**

Two affected individuals were genotyped in each family to search for a putative shared haplotype (last three columns). Homozygous calls shown in red and yellow. Highlighted box shows the 41 kb maximal region where a shared haplotype could not be refuted.

**Table S1. Key Clinical Features of Affected Subjects in Family 1 and Family 2**

| Features              | Frequency | Description or Median Value                                                |
|-----------------------|-----------|----------------------------------------------------------------------------|
| Partial lipodystrophy | 5/5       | Face, flanks, buttocks                                                     |
| Low body mass index   | 4/5       | 17.1 kg/m <sup>2</sup>                                                     |
| Short stature         | 5/5       | Females 152 cm<br>Males 163 cm                                             |
| Progeroid face        | 5/5       | Midface hypoplasia, wide and deep set eyes, triangular face, hypotrichosis |
| Rieger anomaly        | 5/5       | Anterior chamber and iris malformations                                    |

**Table S2. Variant Filtration of Exome Sequencing Data**

| Filter                                                                                                                     | Remaining Number of Variants |
|----------------------------------------------------------------------------------------------------------------------------|------------------------------|
| Exomic variants identified in Subject III-2 of Family 1 <sup>a</sup>                                                       | 14,253                       |
| Excluding synonymous variants                                                                                              | 6,467                        |
| Excluding variants found in 52 Norwegian exomes or in the 1000Genomes <sup>b</sup> database (minor allele frequency >0.5%) | 182                          |
| Excluding variants not present in both affected subjects                                                                   | 49                           |
| Excluding variants present in healthy sibling or dbSNP <sup>c</sup> database                                               | 22                           |

<sup>a</sup>Three patients from the Norwegian family (Family 1) was exome-sequenced, the affected proband, his affected aunt and his non-affected brother. Twenty-two rare genetic variants fitted a dominant disease model in the family.

<sup>b</sup><http://www.1000genomes.org/>.

<sup>c</sup><http://www.ncbi.nlm.nih.gov/projects/SNP/>.

**Table S3. Candidate Rare Variants Identified by Exome Sequencing after Filtering<sup>a</sup>**

| Position         | Type of Mutation | Gene            | cDNA Change | Protein Change |
|------------------|------------------|-----------------|-------------|----------------|
| Chr12: 9020954   | nonsynonymous    | <i>A2ML1</i>    | c.4061+1G>A | Splice         |
| Chr1: 11249707   | nonsynonymous    | <i>ANGPTL7</i>  | c.71C>T     | p.A24V         |
| Chr1: 45253091   | nonsynonymous    | <i>BEST4</i>    | c.200G>A    | p.R67Q         |
| Chr5: 39306775   | nonsynonymous    | <i>C9</i>       | c.1360G>A   | p.D454N        |
| ChrX: 72673407   | nonsynonymous    | <i>CDX4</i>     | c.557T>G    | p.L186W        |
| Chr13: 25480072  | nonsynonymous    | <i>CENPJ</i>    | c.2104A>G   | p.S702G        |
| Chr11: 10786213  | nonsynonymous    | <i>CTR9</i>     | c.1532G>A   | p.C511Y        |
| Chr9: 105767074  | nonsynonymous    | <i>CYLC2</i>    | c.278C>T    | p.A93V         |
| Chr19: 15648692  | nonsynonymous    | <i>CYP4F22</i>  | c.559C>T    | p.R187W        |
| Chr3: 132221143  | nonsynonymous    | <i>DNAJC13</i>  | c.4547G>A   | p.R1516H       |
| Chr1: 16641889   | nonsynonymous    | <i>FBXO42</i>   | c.25G>A     | p.D9N          |
| Chr9: 37426621   | nonsynonymous    | <i>GRHPR</i>    | c.374G>A    | p.R125Q        |
| Chr6: 56919345   | nonsynonymous    | <i>KIAA1586</i> | c.2048A>G   | p.N683S        |
| ChrX: 75648697   | nonsynonymous    | <i>MAGEE1</i>   | c. 374G>A   | p.C125Y        |
| ChrX: 19379488   | nonsynonymous    | <i>MAP3K15</i>  | c.3826A>C   | p.T1276P       |
| Chr19: 54678024  | nonsynonymous    | <i>MBOAT7</i>   | c.914G>A    | p.R305Q        |
| Chr11: 119213348 | nonsynonymous    | <i>MFRP</i>     | c.1345G>A   | p.G449S        |
| Chr5: 67592129   | nonsynonymous    | <i>PIK3R1</i>   | c.1945C>T   | p.R649W        |
| Chr19: 7625573   | nonsynonymous    | <i>PNPLA6</i>   | c.3544T>C   | p.W1182R       |
| Chr5: 89783851   | nonsynonymous    | <i>POLR3G</i>   | c.152G>C    | p.G51A         |
| Chr20: 43938333  | nonsynonymous    | <i>RBPJL</i>    | c.257+1G>T  | Splice         |
| Chr15: 71184356  | nonsynonymous    | <i>THAP10</i>   | c.256G>A    | p.V86M         |

<sup>a</sup>Based on an autosomal dominant model.
